# Supplementary material for: What do Canadians think of advanced care planning? Findings from an online opinion poll
Source: PubMed Central journal article supplement — BMJ Support Palliat Care. 2013 Oct 4;5(1):40–7. doi: 10.1136/bmjspcare-2013-000473 (PMC4345810; doi:10.1136/bmjspcare-2013-000473), 2013-10-04
Supplement: bmjspcare-2013-000473-s1.pdf [file bmjspcare-2013-000473-s1.pdf]

Supplementary Table 1 - Bivariate analysis of Selected Socio-demographic Variables  
(unadjusted Odds Ratio) on Advance Care Planning Outcomes

|                                                 | Odds ratio   | P> z             | [95% CI]     |              |
|-------------------------------------------------|--------------|------------------|--------------|--------------|
| Model 1: Has heard of ACP                       |              |                  |              |              |
| Female                                          | 1.028        | 0.84             | 0.788        | 1.340        |
| <b>Age (6 categories)</b>                       | <b>1.212</b> | <b>0.000</b>     | <b>1.101</b> | <b>1.335</b> |
| <b>Education (4 categories)</b>                 | <b>1.284</b> | <b>0.003</b>     | <b>1.091</b> | <b>1.511</b> |
| Income (5 categories)                           | 1.066        | 0.325            | 0.938        | 1.212        |
| <b>Has “kids” in household</b>                  | <b>0.472</b> | <b>0.002</b>     | <b>0.294</b> | <b>0.755</b> |
| Not born in Canada                              | 1.084        | 0.676            | 0.742        | 1.586        |
| <b>Fraser Health Authority</b>                  | <b>1.363</b> | <b>0.025</b>     | <b>1.039</b> | <b>1.789</b> |
| Model 2: Discussed ACP with family/friends      |              |                  |              |              |
| <b>Female</b>                                   | <b>1.391</b> | <b>0.001</b>     | <b>1.136</b> | <b>1.703</b> |
| <b>Age (6 categories)</b>                       | <b>1.411</b> | <b>&lt;0.001</b> | <b>1.312</b> | <b>1.518</b> |
| Education (4 categories)                        | 0.956        | 0.461            | 0.847        | 1.078        |
| <b>Income (5 categories)</b>                    | <b>1.111</b> | <b>0.034</b>     | <b>1.008</b> | <b>1.225</b> |
| <b>Has “kids” in household</b>                  | <b>0.588</b> | <b>&lt;0.001</b> | <b>0.440</b> | <b>0.787</b> |
| Not born in Canada                              | 1.010        | 0.945            | 0.753        | 1.356        |
| <b>Fraser Health Authority</b>                  | <b>1.369</b> | <b>0.004</b>     | <b>1.106</b> | <b>1.694</b> |
| Model 3: Discussed ACP with healthcare provider |              |                  |              |              |
| Female                                          | 0.861        | 0.360            | 0.624        | 1.187        |
| <b>Age (6 categories)</b>                       | <b>1.341</b> | <b>&lt;0.001</b> | <b>1.185</b> | <b>1.517</b> |

|                                          |              |                  |              |              |
|------------------------------------------|--------------|------------------|--------------|--------------|
| Education (4 categories)                 | 0.888        | 0.219            | 0.735        | 1.073        |
| <b>Income (5 categories)</b>             | <b>0.784</b> | <b>0.002</b>     | <b>0.671</b> | <b>0.917</b> |
| <b>Has “kids” in household</b>           | <b>0.276</b> | <b>&lt;0.001</b> | <b>0.134</b> | <b>0.569</b> |
| <b>Not born in Canada</b>                | <b>1.888</b> | <b>0.002</b>     | <b>1.263</b> | <b>2.822</b> |
| Fraser Health Authority                  | 1.234        | 0.210            | 0.888        | 1.716        |
| Model 4: Has a written ACP plan          |              |                  |              |              |
| Female                                   | 1.115        | 0.407            | 0.861        | 1.444        |
| <b>Age (6 categories)</b>                | <b>1.575</b> | <b>&lt;0.001</b> | <b>1.415</b> | <b>1.753</b> |
| Education (4 categories)                 | 1.148        | 0.081            | 0.983        | 1.342        |
| Income (5 categories)                    | 1.045        | 0.487            | 0.923        | 1.183        |
| <b>Has “kids” in household</b>           | <b>0.478</b> | <b>0.001</b>     | <b>0.304</b> | <b>0.751</b> |
| Not born in Canada                       | 1.130        | 0.514            | 0.783        | 1.629        |
| <b>Fraser Health Authority</b>           | <b>0.712</b> | <b>0.018</b>     | <b>0.537</b> | <b>0.943</b> |
| Model 5: Has a designated decision maker |              |                  |              |              |
| Female                                   | 1.085        | 0.426            | 0.887        | 1.328        |
| <b>Age (6 categories)</b>                | <b>1.416</b> | <b>&lt;0.001</b> | <b>1.315</b> | <b>1.525</b> |
| Education (4 categories)                 | 0.947        | 0.371            | 0.840        | 1.067        |
| <b>Income (5 categories)</b>             | <b>1.145</b> | <b>0.007</b>     | <b>1.038</b> | <b>1.262</b> |
| <b>Has “kids” in household</b>           | <b>0.649</b> | <b>0.004</b>     | <b>0.483</b> | <b>0.872</b> |
| Not born in Canada                       | 0.927        | 0.614            | 0.691        | 1.245        |
| Fraser Health Authority                  | 0.936        | 0.542            | 0.758        | 1.157        |

Legend: Bivariate logistic Regression Models of ACP outcomes on selected socio-demographic variables Canadian Ipsos-Reid sample (n=1523), Odds Ratios (ORs) and 95% Confidence Intervals (95% CIs)
